# Supplementary material for: Evaluations of Action and Inaction Decision-makers in Risky Decisions Resulting in Negative Outcomes: Inaction Agents Are Preferred to and Perceived as More Competent and Normative Than Action Agents
Source: Oxford University Press journal article supplement (doi:10.1525/collabra.74817), 2023-01-01
Supplement: collabra_2023_9_1_74817_157697.docx [file collabra_2023_9_1_74817_157697.docx]

Evaluations of action and inaction decision-makers in risky decisions resulting in negative outcomes: Inaction agents are preferred to and perceived as more competent and normative than action agents

Supplementary

Contents

[Supplementary 1](#_Toc112234372)

[Open Science disclosures 2](#_Toc112234373)

[Procedure and data disclosures 2](#_Toc112234374)

[Data collection 2](#_Toc112234375)

[Conditions reporting 2](#_Toc112234376)

[Data exclusions 2](#_Toc112234377)

[Variables reporting 2](#_Toc112234378)

[Power-analysis 3](#_Toc112234379)

[Study 1a 3](#_Toc112234380)

[Study 1b 3](#_Toc112234381)

[Study 2 3](#_Toc112234382)

[Tables 4](#_Toc112234383)

[Figures 8](#_Toc112234384)

[One-way ANOVA Study 2 17](#_Toc112234385)

[One-Way ANOVA 17](#_Toc112234386)

[Post Hoc Tests 17](#_Toc112234387)

[Reference 21](#_Toc112234388)

# Open Science disclosures

## Procedure and data disclosures

### Data collection

Data collection was completed before analyzing the data.

### Conditions reporting

All collected conditions are reported.

### Data exclusions

Details are reported in the materials section of this document

### Variables reporting

All variables collected for this study are reported and included in the provided data.

# Power-analysis

## Study 1a


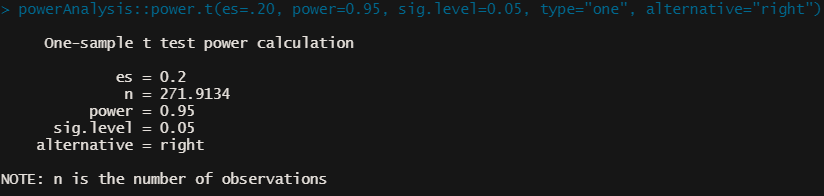


## Study 1b


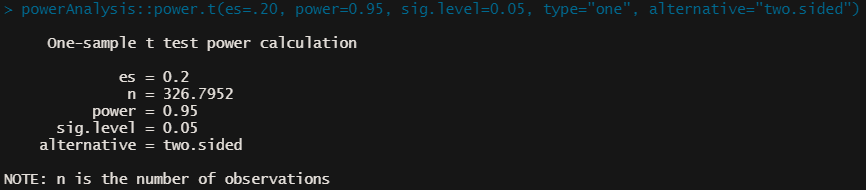


## Study 2


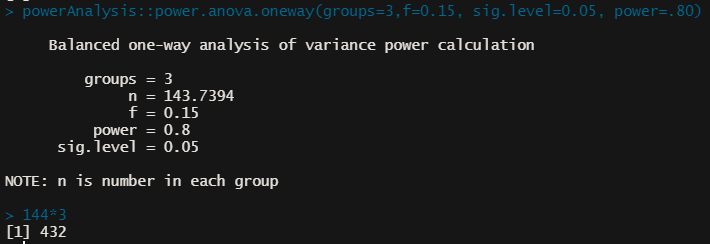


# Tables

Table S1

*Studies 1a/1b: Summary of one-sample t-tests*

| Variable | *t* | *df* | *p* | *d* | *95% CI* |
| --- | --- | --- | --- | --- | --- |
| Study 1a (*n* = 339) | | | | | |
| Preference | -7.73 | 255 | <.001 | -0.48 | [-0.61, -0.35] |
| Competence | -4.51 | 273 | <.001 | -0.27 | [-0.39, -0.15] |
| Normative | -4.26 | 270 | <.001 | -0.26 | [-0.38, -0.14] |
| Regret | 12.71 | 263 | <.001 | 0.78 | [0.64, 0.92] |
| Study 1b (*n* = 339) | | | | | |
| Preference | -6.29 | 338 | <.001 | -0.34 | [-0.45, -0.23] |
| Competence | -4.00 | 338 | <.001 | -0.22 | [-0.33, -0.11] |
| Normative | -5.16 | 338 | <.001 | -0.28 | [-0.39, -0.17] |
| Regret | 14.01 | 338 | <.001 | 0.76 | [0.64, 0.88] |

*Note.* *t* = one sample t-test against *M* = 0, *df* = degree of freedom, all *ps* <.001, *d* = Cohen’s *d*,
*95% CI* = 95% confidence interval around Cohen’s *d*.

Table S2

*Study 2: Summary of one-sample t-tests*

| Variable | *t* | *df* | *p* | *d* | *95% CI* |
| --- | --- | --- | --- | --- | --- |
| Preference | -3.91 | 455 | <.001 | -0.18 | [-0.28, -0.09] |
| Competence | -4.33 | 453 | <.001 | -0.20 | [-0.30, -0.11] |
| Descriptive norms | 1.21 | 455 | .23 | 0.06 | [-0.04, 0.15] |
| Injunctive norms | 6.13 | 455 | <.001 | 0.29 | [0.19, 0.38] |
| Regret | 16.71 | 456 | <.001 | 0.78 | [0.68, 0.89] |
| Joy | 4.45 | 454 | <.001 | 0.21 | [0.12, 0.30] |

*Note.* *t* = one sample t-test against *M* = 0, *df* = degree of freedom, all *ps* <.001, *d* = Cohen’s *d*,
*95% CI* = 95% confidence interval around Cohen’s *d*.

Table S3

*Study 2: Correlations table*

| Variables | Preference | | Competence | | Descriptive norms | | Injunctive norms | | Regret | | Joy | |
| --- | --- | --- | --- | --- | --- | --- | --- | --- | --- | --- | --- | --- |
|  | *r* | *p* | *r* | *p* | *r* | *p* | *r* | *p* | *r* | *p* | *r* | *p* |
| Preference |  |  | .44 [.35, .50] | <.001 | .03 [-.07, .14] | .49 | -.34 [-.42, -.26] | <.001 | -.27 [-.35, -.18] | <.001 | .07 [-.03, .17] | .12 |
| Competence |  |  |  |  | .15 [.06, .25] | .001 | -.28 [-.37, -.20] | <.001 | -.19 [-.28, -.09] | <.001 | .01 [-.09, .12] | .63 |
| Descriptive  norms |  |  |  |  |  |  | -.25 [-.33, -.16] | < .001 | -.11 [-.21, -.01] | 0.02 | .06 [-.05, .16] | .28 |
|  |  |  |  |  |  |  |  |  |  |  |  |  |
| Injunctive  norms |  |  |  |  |  |  |  |  | .24 [.16, .33] | <.001 | -.15 [-.24, -.05] | .004 |
| Regret |  |  |  |  |  |  |  |  |  |  | .00 [-.10, .11] | .97 |
| Joy |  |  |  |  |  |  |  |  |  |  |  |  |

*Note.* N = 460. *r* = Pearson’s correlation. All measures were between -5 (Paul, Inaction) and +5 (George, Action). Values in brackets represent 95% interval confidence for Pearson’s *r.*

Table S4

*Study 2: Experimental design*

| **IV: No prior  (control / replication)**  Paul and George are two financial advisors.  In the past, Paul invested his client's money in stocks in Company A and  George invested his client's money in Company B. | **IV: Negative prior outcomes**  Paul and George are two financial advisors.  In the past, Paul invested his client's money in stocks in Company A, and these investments usually *lost money* for the clients.  George invested his client's money in Company B, and these investments usually *lost money* for the clients. | **IV: Positive prior**  Paul and George are two financial advisors.  In the past, Paul invested his client's money in stocks in Company A, and these investments were usually *profitable* for the clients.  George invested his client's money in Company B, and these investments were usually *profitable* for the clients. |
| --- | --- | --- |
| **Manipulation check**  "To what extent do you expect Paul and George to change their investment behavior in the future?  (-5 = *definitely not changed their behavior*, 5 = *definitely changed their behavior*)." | | | |
| **Scenario**  Paul has continued to invest his client’s money in stocks in company A. During the past year he considered switching to stock in company B, but he decided against it. He now finds out that his client would have been better off by £1.2 million if he had switched to the stock of company B.  George has not continued to invest his client’s money in stocks in company B. During the past year he switched to stock in company A. He now finds out that his client would have been better off by £1.2 million if he had kept his stock in Company B. | | | |
| **Dependent variables**  Orders presentation were randomized.  Scale: -5 = *Definitely Paul who decided not to switch*; 5 *Definitely George who decided to switch*.  Preference  Which advisor – Paul or George – would you prefer to hire in the future?  Competence  Which advisor – Paul or George – is more competent?  Descriptive norms  Whose behavior – Paul’s or George’s – is more common among financial advisors?  Injunctive norms  Whose behavior – Paul’s or George’s – will be more criticized among financial advisors?  Regret  Which advisor – Paul or George – regrets their decision more?  Joy  Which advisor – Paul or George - would have been likely to experience more joy if things had gone well? | | | |

# Figures

Figure S1

*Study 1a: Distribution plots*


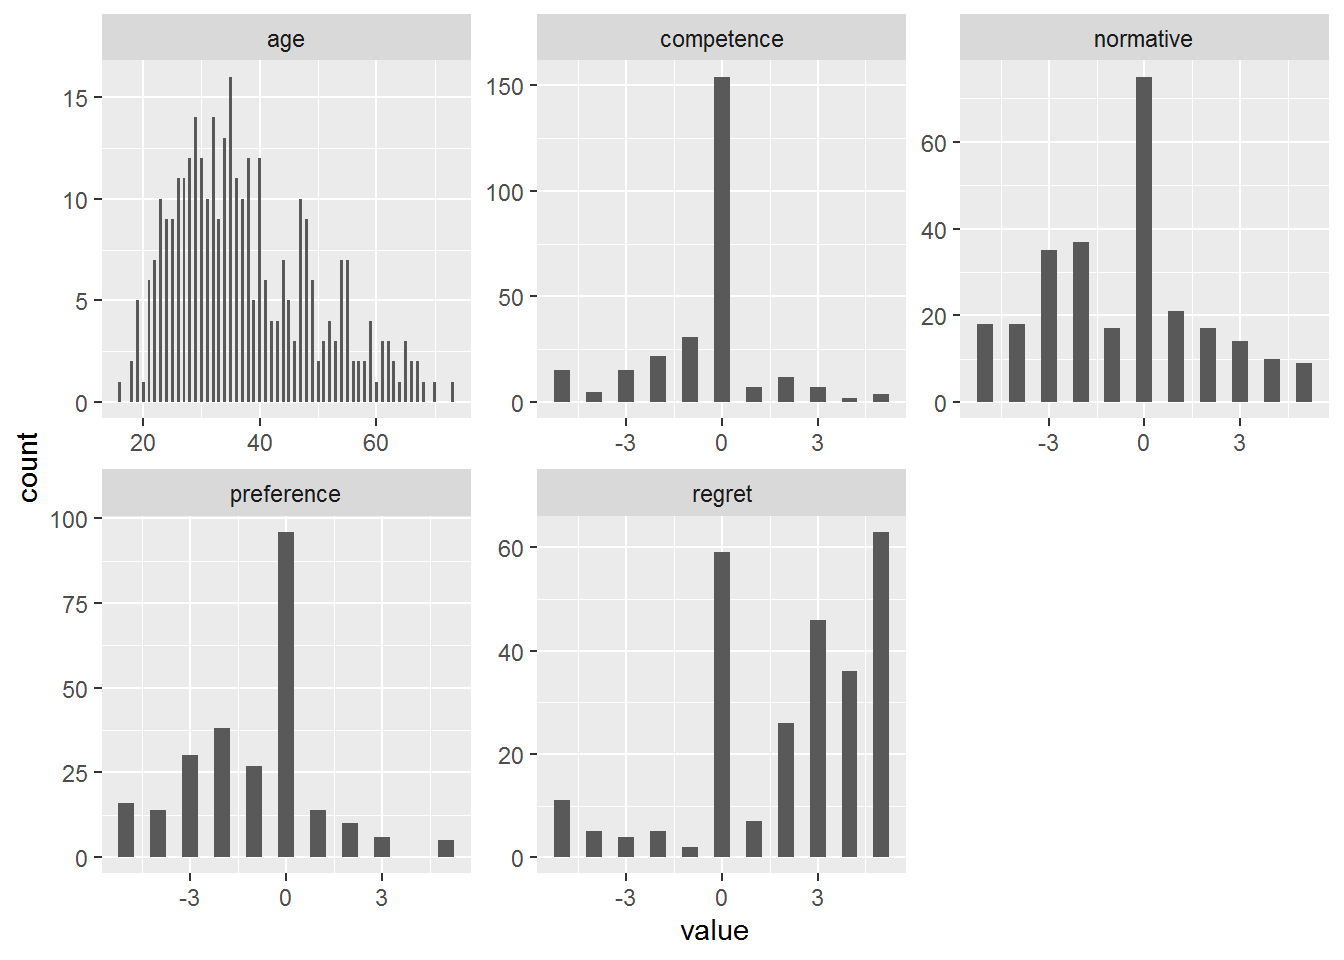


Figure S2

*Study 1b: descriptives*

*
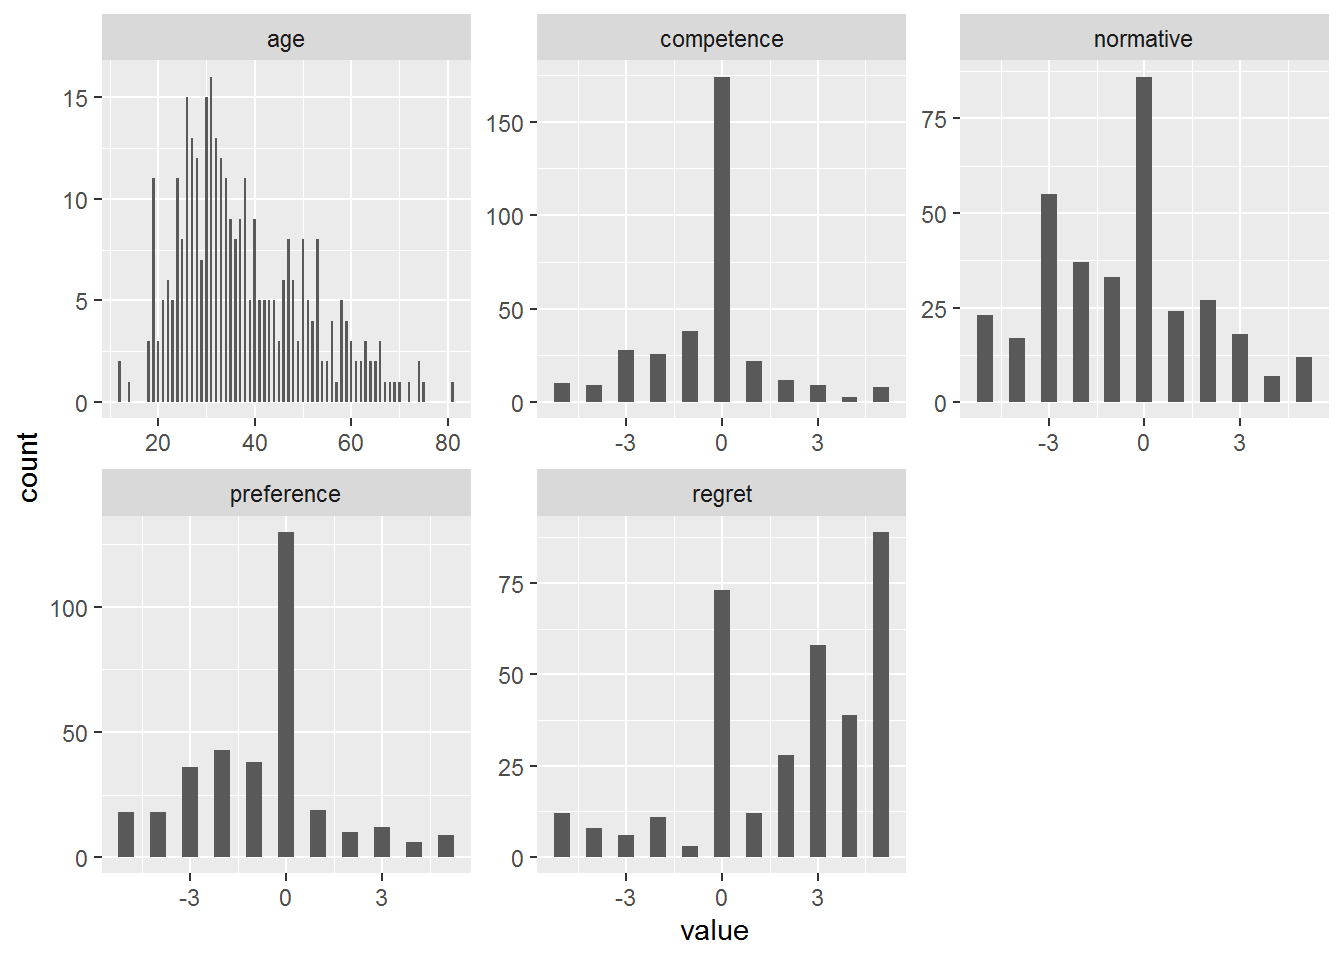
*

Figure S3

*Study 2 descriptives*

*
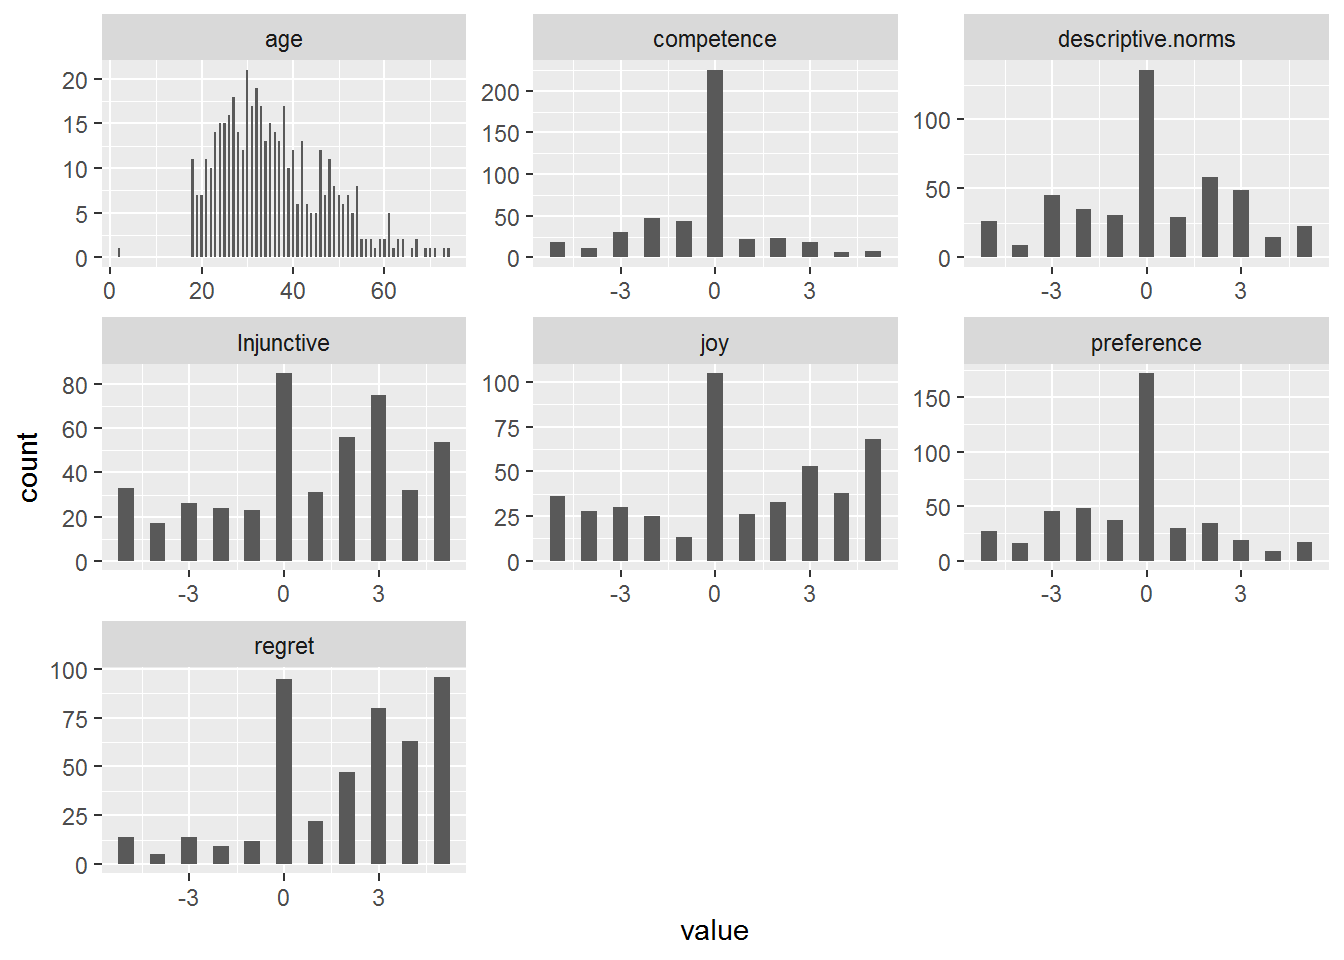
*

Figure S4

*Study 1a: Correlations*

*
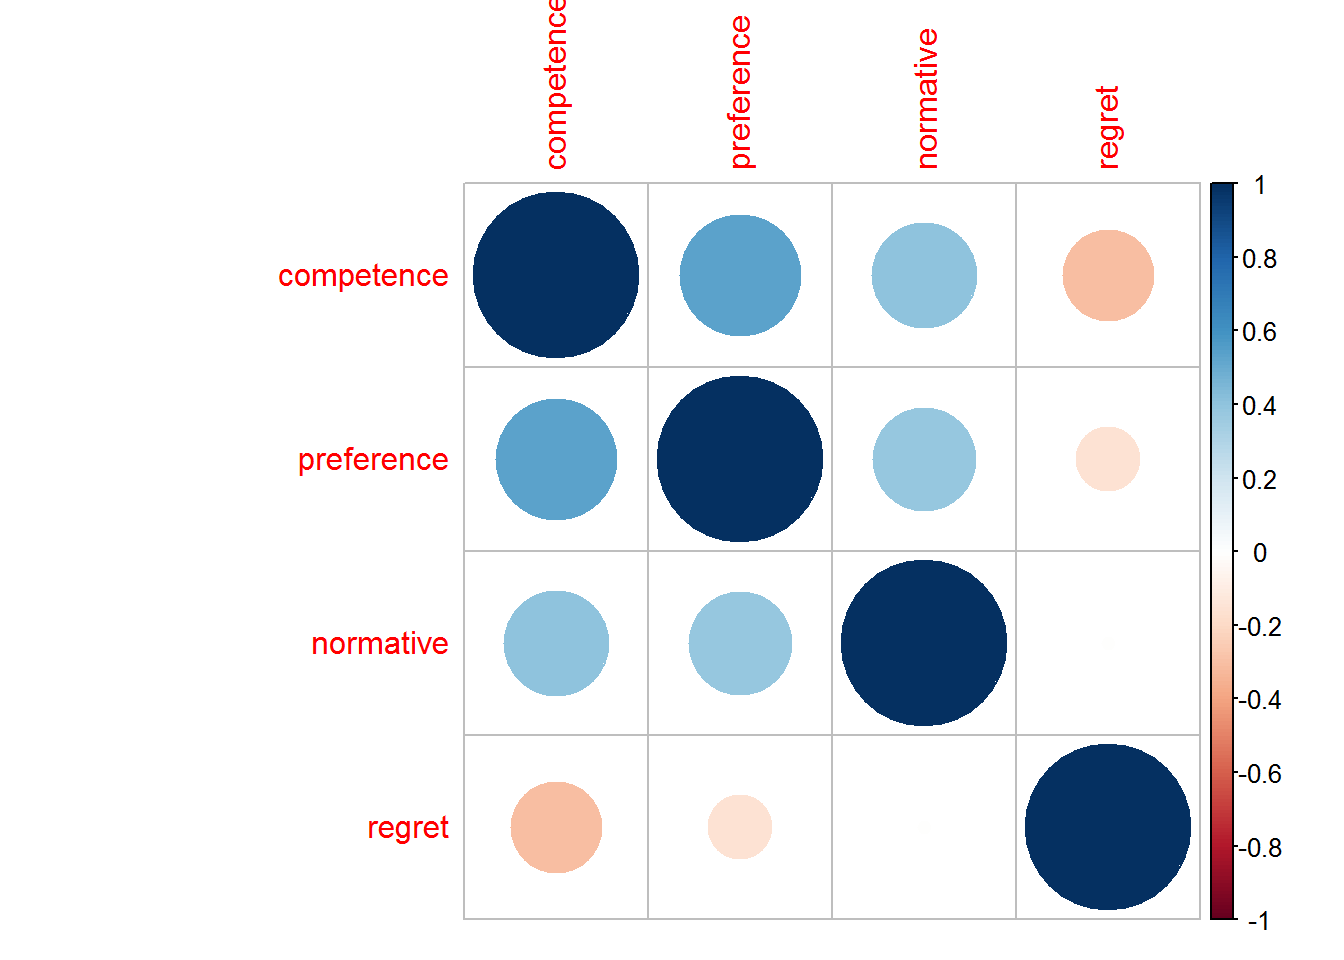
*

Figure S5

*Study 1a: Correlations*

*
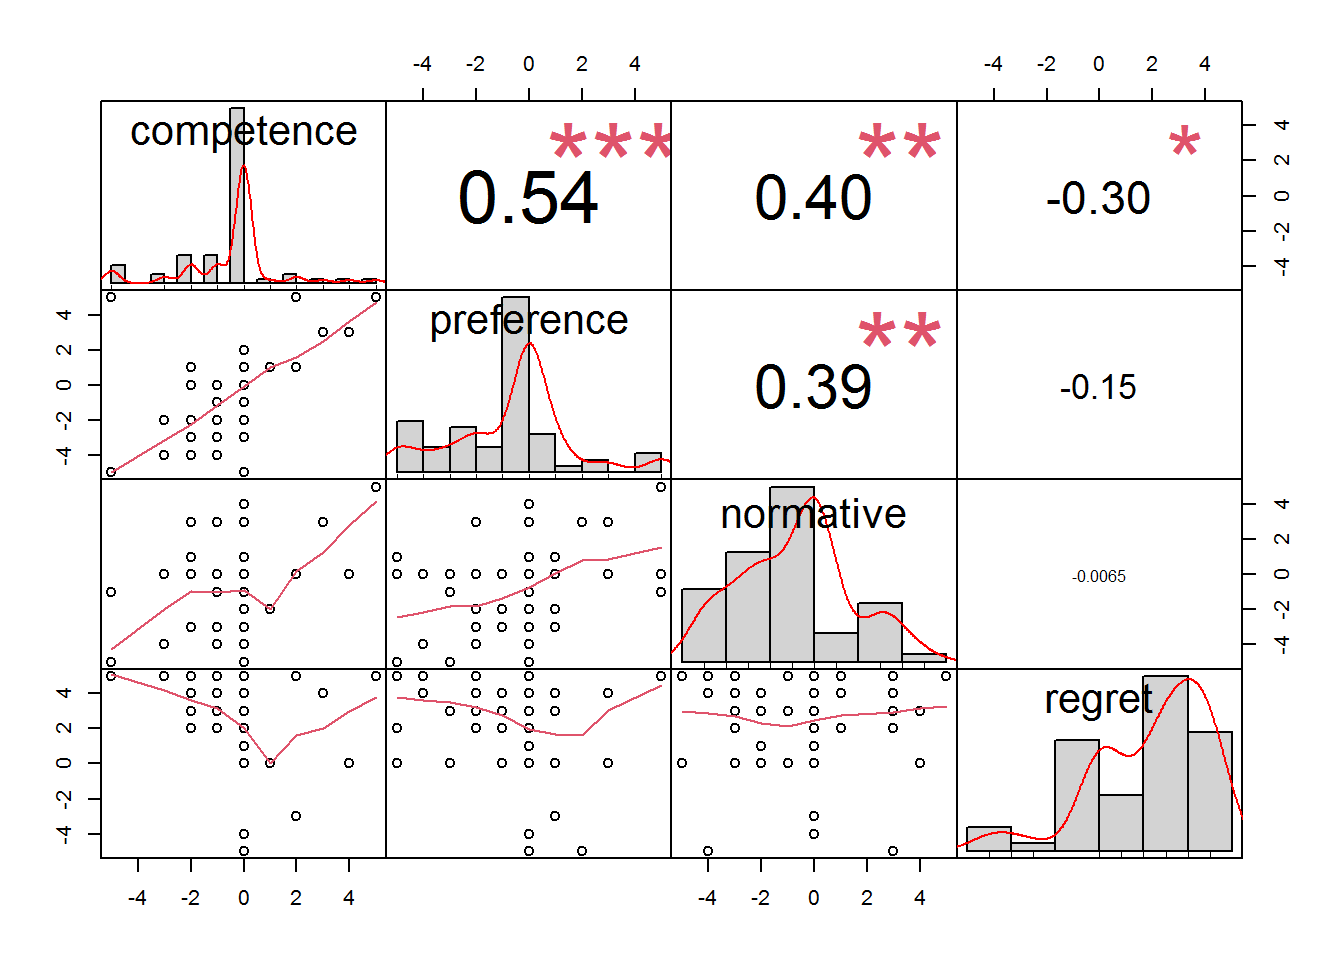
*

Figure S6

*Study 1b: Correlations*

*
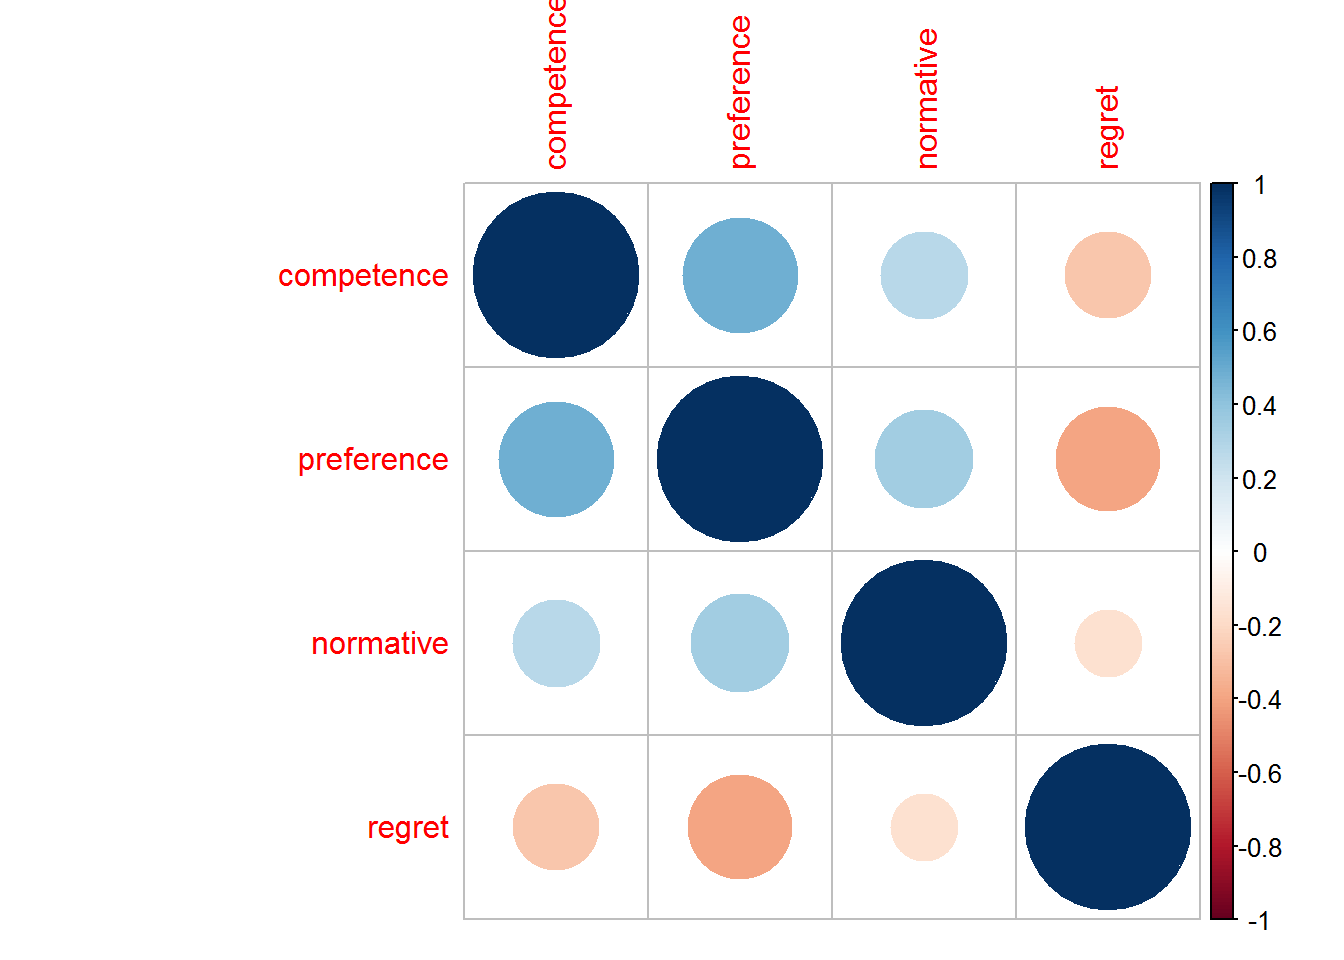
*

Figure S7

*Study 1b: Correlations*

*
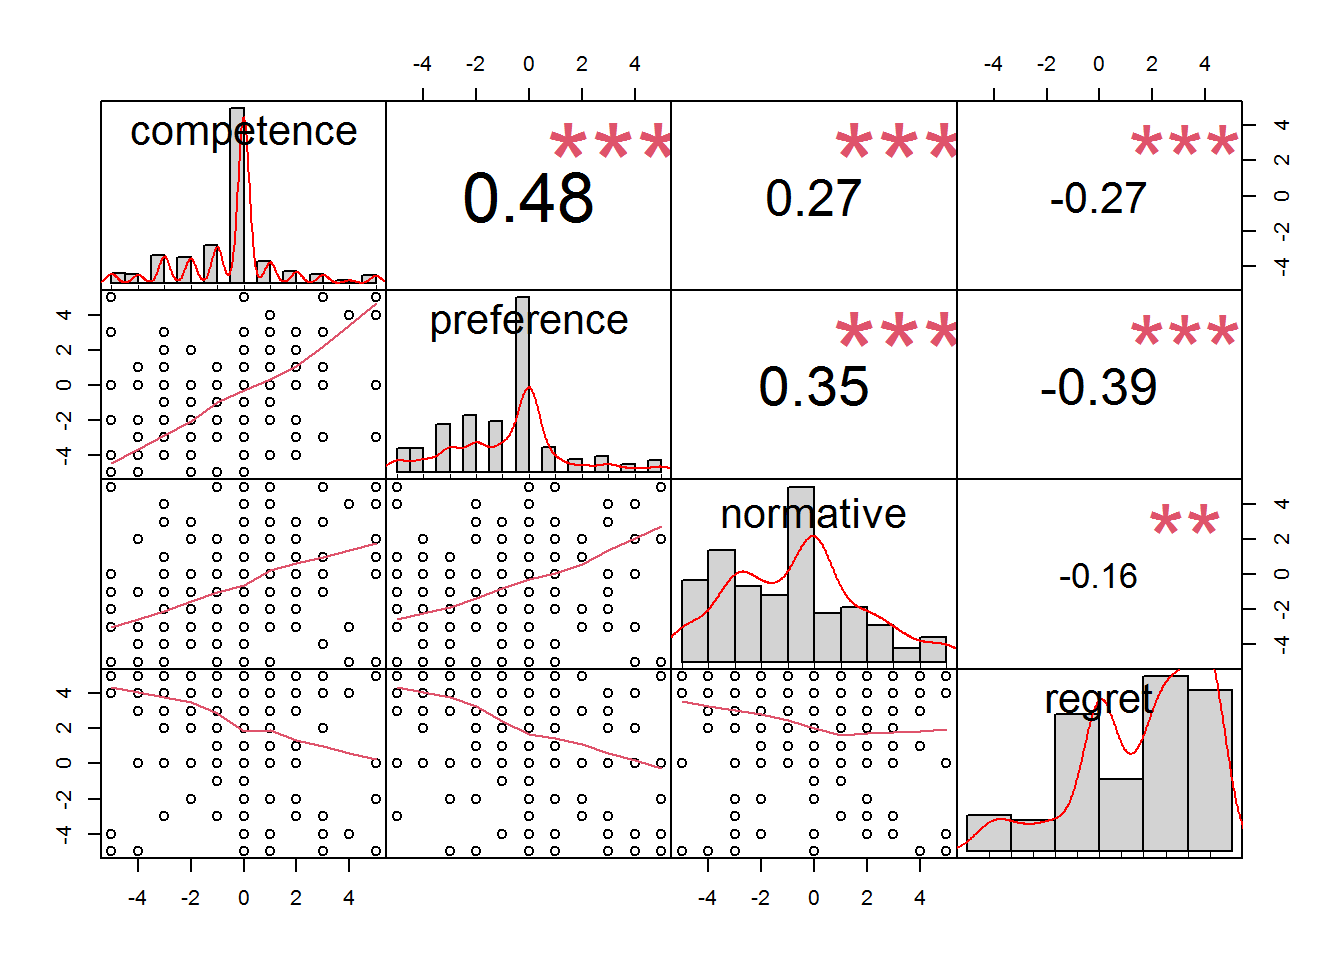
*

Figure S8

*Study 2: Correlations*

*
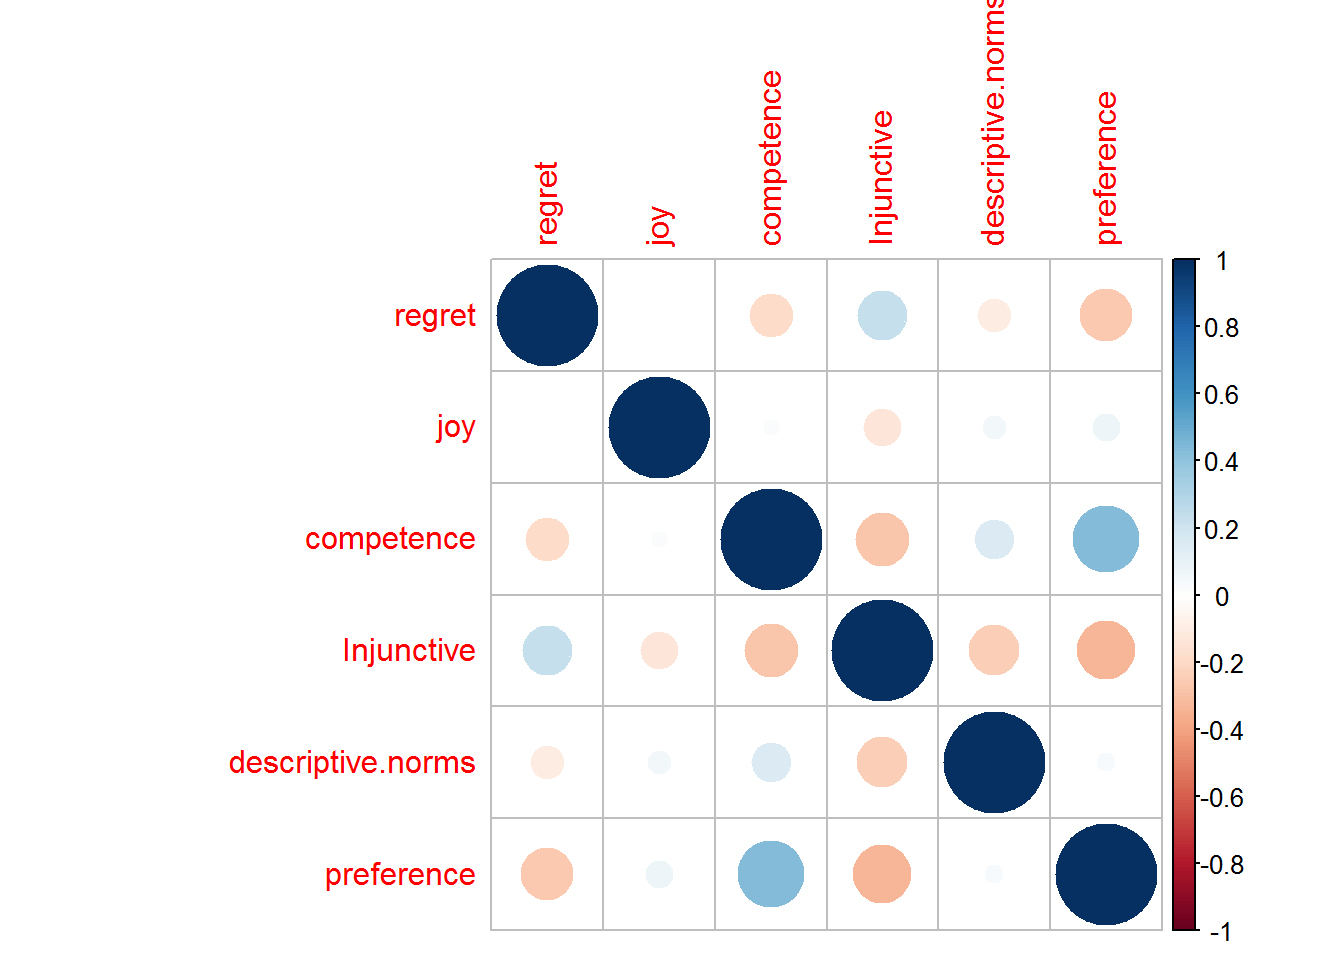
*

Figure S9

*Study 2: Correlations*

*
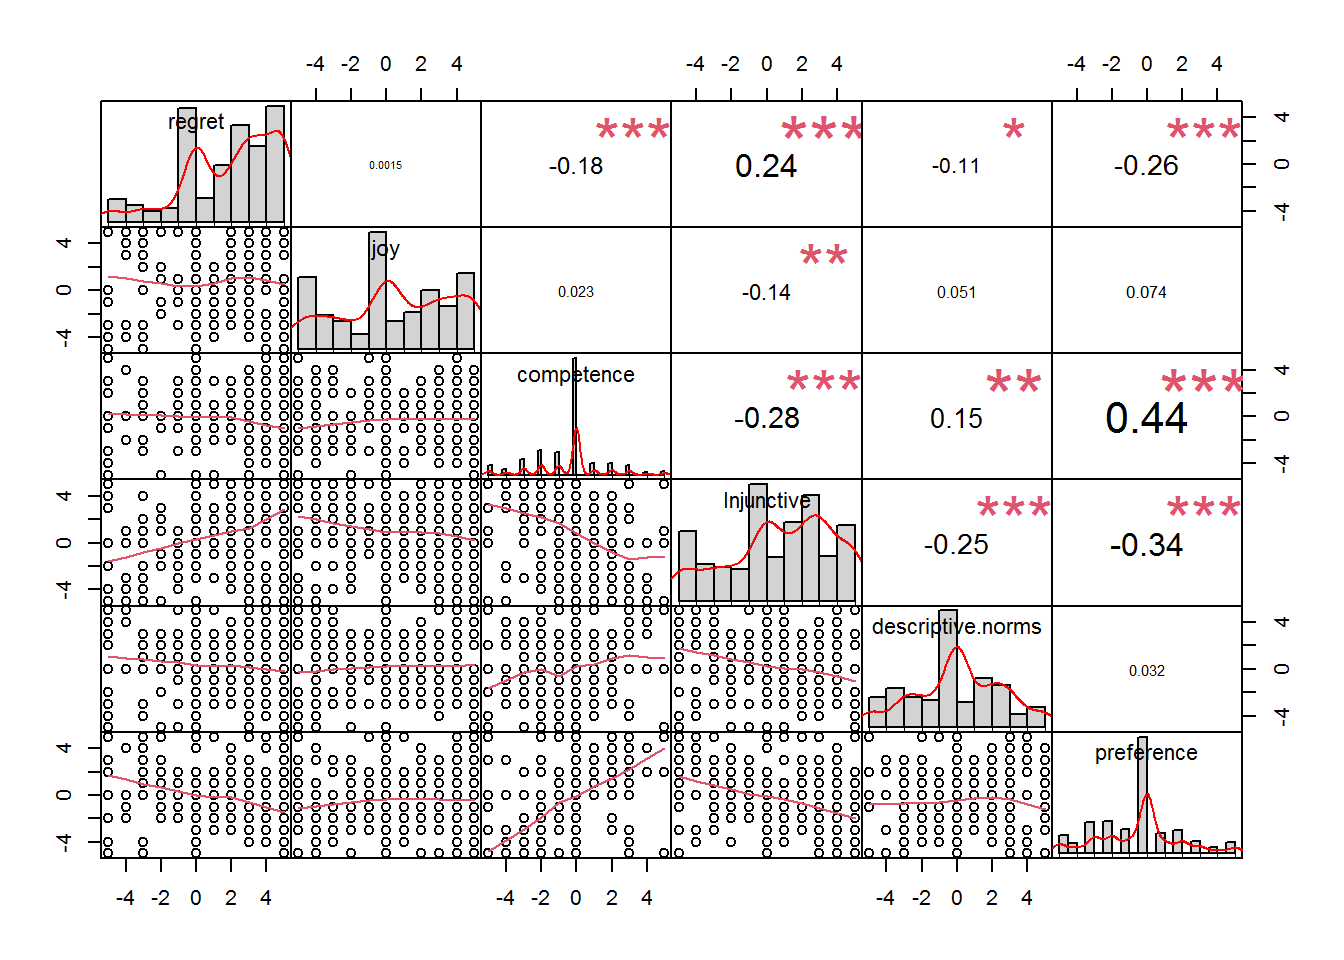
*

# One-way ANOVA Study 2

The ANOVA revealed a difference between the three priors for preference, a difference between control + positive priors vs. negative prior for competence and injunctive norms, and no differences for descriptive norms, regret and joy.

## One-Way ANOVA

| *One-Way ANOVA (Fisher's)* | | | | | | | | | |
| --- | --- | --- | --- | --- | --- | --- | --- | --- | --- |
|  |  |  |  |  |  |  |  |  |  |
|  | | **F** | | **df1** | | **df2** | | **p** | |
| Preference |  | 24.245 |  | 2 |  | 450 |  | < .001 |  |
| Competence |  | 17.608 |  | 2 |  | 448 |  | < .001 |  |
| Descriptive norms |  | 0.476 |  | 2 |  | 450 |  | 0.621 |  |
| Injunctive norms |  | 17.547 |  | 2 |  | 450 |  | < .001 |  |
| Regret |  | 1.799 |  | 2 |  | 451 |  | 0.167 |  |
| Joy |  | 2.115 |  | 2 |  | 449 |  | 0.122 |  |
|  | | | | | | | | | |

## Post Hoc Tests

| Tukey Post-Hoc Test – preference | | | | | | | | | |
| --- | --- | --- | --- | --- | --- | --- | --- | --- | --- |
|  |  |  |  |  |  |  |  |  |  |
|  | |  | | **1** | | **2** | | **3** | |
| 1 |  | Mean difference |  | — |  | 0.762 | ** | -0.957 | *** |
|  |  | t-value |  | — |  | 3.04 |  | -3.74 |  |
|  |  | df |  | — |  | 450 |  | 450 |  |
|  |  | p-value |  | — |  | 0.007 |  | < .001 |  |
| 2 |  | Mean difference |  |  |  | — |  | -1.719 | *** |
|  |  | t-value |  |  |  | — |  | -6.96 |  |
|  |  | df |  |  |  | — |  | 450 |  |
|  |  | p-value |  |  |  | — |  | < .001 |  |
| 3 |  | Mean difference |  |  |  |  |  | — |  |
|  |  | t-value |  |  |  |  |  | — |  |
|  |  | df |  |  |  |  |  | — |  |
|  |  | p-value |  |  |  |  |  | — |  |
| Note. * p < .05, ** p < .01, *** p < .001 | | | | | | | | | |
|  | | | | | | | | | |

| Tukey Post-Hoc Test – competence | | | | | | | | | |
| --- | --- | --- | --- | --- | --- | --- | --- | --- | --- |
|  |  |  |  |  |  |  |  |  |  |
|  | |  | | **1** | | **2** | | **3** | |
| 1 |  | Mean difference |  | — |  | 0.309 |  | -0.888 | *** |
|  |  | t-value |  | — |  | 1.46 |  | -4.12 |  |
|  |  | df |  | — |  | 448 |  | 448 |  |
|  |  | p-value |  | — |  | 0.309 |  | < .001 |  |
| 2 |  | Mean difference |  |  |  | — |  | -1.197 | *** |
|  |  | t-value |  |  |  | — |  | -5.76 |  |
|  |  | df |  |  |  | — |  | 448 |  |
|  |  | p-value |  |  |  | — |  | < .001 |  |
| 3 |  | Mean difference |  |  |  |  |  | — |  |
|  |  | t-value |  |  |  |  |  | — |  |
|  |  | df |  |  |  |  |  | — |  |
|  |  | p-value |  |  |  |  |  | — |  |
| Note. * p < .05, ** p < .01, *** p < .001 | | | | | | | | | |
|  | | | | | | | | | |

| Tukey Post-Hoc Test – descriptive norms | | | | | | | | | |
| --- | --- | --- | --- | --- | --- | --- | --- | --- | --- |
|  |  |  |  |  |  |  |  |  |  |
|  | |  | | **1** | | **2** | | **3** | |
| 1 |  | Mean difference |  | — |  | 0.270 |  | 0.2185 |  |
|  |  | t-value |  | — |  | 0.931 |  | 0.737 |  |
|  |  | df |  | — |  | 450 |  | 450 |  |
|  |  | p-value |  | — |  | 0.621 |  | 0.741 |  |
| 2 |  | Mean difference |  |  |  | — |  | -0.0516 |  |
|  |  | t-value |  |  |  | — |  | -0.181 |  |
|  |  | df |  |  |  | — |  | 450 |  |
|  |  | p-value |  |  |  | — |  | 0.982 |  |
| 3 |  | Mean difference |  |  |  |  |  | — |  |
|  |  | t-value |  |  |  |  |  | — |  |
|  |  | df |  |  |  |  |  | — |  |
|  |  | p-value |  |  |  |  |  | — |  |
| Note. * p < .05, ** p < .01, *** p < .001 | | | | | | | | | |
|  | | | | | | | | | |

| Tukey Post-Hoc Test – Injunctive | | | | | | | | | |
| --- | --- | --- | --- | --- | --- | --- | --- | --- | --- |
|  |  |  |  |  |  |  |  |  |  |
|  | |  | | **1** | | **2** | | **3** | |
| 1 |  | Mean difference |  | — |  | -0.718 |  | 1.17 | ** |
|  |  | t-value |  | — |  | -2.21 |  | 3.52 |  |
|  |  | df |  | — |  | 450 |  | 450 |  |
|  |  | p-value |  | — |  | 0.071 |  | 0.001 |  |
| 2 |  | Mean difference |  |  |  | — |  | 1.89 | *** |
|  |  | t-value |  |  |  | — |  | 5.89 |  |
|  |  | df |  |  |  | — |  | 450 |  |
|  |  | p-value |  |  |  | — |  | < .001 |  |
| 3 |  | Mean difference |  |  |  |  |  | — |  |
|  |  | t-value |  |  |  |  |  | — |  |
|  |  | df |  |  |  |  |  | — |  |
|  |  | p-value |  |  |  |  |  | — |  |
| Note. * p < .05, ** p < .01, *** p < .001 | | | | | | | | | |
|  | | | | | | | | | |

| Tukey Post-Hoc Test – regret | | | | | | | | | |
| --- | --- | --- | --- | --- | --- | --- | --- | --- | --- |
|  |  |  |  |  |  |  |  |  |  |
|  | |  | | **1** | | **2** | | **3** | |
| 1 |  | Mean difference |  | — |  | -0.279 |  | 0.276 |  |
|  |  | t-value |  | — |  | -0.940 |  | 0.913 |  |
|  |  | df |  | — |  | 451 |  | 451 |  |
|  |  | p-value |  | — |  | 0.615 |  | 0.632 |  |
| 2 |  | Mean difference |  |  |  | — |  | 0.555 |  |
|  |  | t-value |  |  |  | — |  | 1.896 |  |
|  |  | df |  |  |  | — |  | 451 |  |
|  |  | p-value |  |  |  | — |  | 0.141 |  |
| 3 |  | Mean difference |  |  |  |  |  | — |  |
|  |  | t-value |  |  |  |  |  | — |  |
|  |  | df |  |  |  |  |  | — |  |
|  |  | p-value |  |  |  |  |  | — |  |
| Note. * p < .05, ** p < .01, *** p < .001 | | | | | | | | | |
|  | | | | | | | | | |

| Tukey Post-Hoc Test – joy | | | | | | | | | |
| --- | --- | --- | --- | --- | --- | --- | --- | --- | --- |
|  |  |  |  |  |  |  |  |  |  |
|  | |  | | **1** | | **2** | | **3** | |
| 1 |  | Mean difference |  | — |  | -0.0101 |  | -0.651 |  |
|  |  | t-value |  | — |  | -0.0280 |  | -1.76 |  |
|  |  | df |  | — |  | 449 |  | 449 |  |
|  |  | p-value |  | — |  | 1.000 |  | 0.183 |  |
| 2 |  | Mean difference |  |  |  | — |  | -0.641 |  |
|  |  | t-value |  |  |  | — |  | -1.80 |  |
|  |  | df |  |  |  | — |  | 449 |  |
|  |  | p-value |  |  |  | — |  | 0.170 |  |
| 3 |  | Mean difference |  |  |  |  |  | — |  |
|  |  | t-value |  |  |  |  |  | — |  |
|  |  | df |  |  |  |  |  | — |  |
|  |  | p-value |  |  |  |  |  | — |  |
| Note. * p < .05, ** p < .01, *** p < .001 | | | | | | | | | |
|  | | | | | | | | | |

# Reference

Achim Zeileis and Gabor Grothendieck (2005). zoo: S3 Infrastructure for Regular and Irregular Time Series. Journal of Statistical Software, 14(6), 1-27. doi:10.18637/jss.v014.i06

Brian G. Peterson and Peter Carl (2020). PerformanceAnalytics: Econometric Tools for Performance and Risk Analysis. R package version 2.0.4. https://CRAN.R-project.org/package=PerformanceAnalytics

Frank E Harrell Jr, with contributions from Charles Dupont and many others. (2021). Hmisc: Harrell Miscellaneous. R package version 4.5-0. https://CRAN.R-project.org/package=Hmisc

H. Wickham. ggplot2: Elegant Graphics for Data Analysis. Springer-Verlag New York, 2016.

Hadley Wickham (2019). stringr: Simple, Consistent Wrappers for Common String Operations. R package version 1.4.0. https://CRAN.R-project.org/package=stringr

Hadley Wickham (2021). forcats: Tools for Working with Categorical Variables (Factors). R package version 0.5.1. https://CRAN.R-project.org/package=forcats

Hadley Wickham (2021). tidyr: Tidy Messy Data. R package version 1.1.3. https://CRAN.R-project.org/package=tidyr

Hadley Wickham and Jim Hester (2020). readr: Read Rectangular Text Data. R package version 1.4.0. https://CRAN.R-project.org/package=readr

Hadley Wickham, Romain François, Lionel Henry and Kirill Müller (2021). dplyr: A Grammar of Data Manipulation. R package version 1.0.6. https://CRAN.R-project.org/package=dplyr

Jeffrey A. Ryan and Joshua M. Ulrich (2020). xts: eXtensible Time Series. R package version 0.12.1. https://CRAN.R-project.org/package=xts

Kirill Müller and Hadley Wickham (2021). tibble: Simple Data Frames. R package version 3.1.2. https://CRAN.R-project.org/package=tibble

Lionel Henry and Hadley Wickham (2020). purrr: Functional Programming Tools. R package version 0.3.4. https://CRAN.R-project.org/package=purrr

Long JA (2020). _jtools: Analysis and Presentation of Social Scientific Data_. Rpackage version 2.1.0, <URL: https://cran.r-project.org/package=jtools>.

Makowski, D., Ben-Shachar, M.S., Patil, I. & Lüdecke, D. (2020). Automated Results Reporting as a Practical Tool to Improve Reproducibility and Methodological Best Practices Adoption. CRAN. Available from https://github.com/easystats/report. doi: .

Max Kuhn, Simon Jackson and Jorge Cimentada (2020). corrr: Correlations in R. R package version 0.4.3. https://CRAN.R-project.org/package=corrr

Olivoto, T., and Lúcio, A.D. (2020). metan: an R package for multi-environment trial analysis. Methods Ecol Evol. 11:783-789 doi:10.1111/2041-210X.13384

Patil, I. (2018). Visualizations with statistical details: The 'ggstatsplot' approach. PsyArxiv. doi:10.31234/osf.io/p7mku

R Core Team (2020). R: A language and environment for statistical computing. R Foundation for Statistical Computing, Vienna, Austria. URL https://www.R-project.org/.

Revelle, W. (2020) psych: Procedures for Personality and Psychological Research, Northwestern University, Evanston, Illinois, USA, https://CRAN.R-project.org/package=psych Version = 2.1.3,.

Sarkar, Deepayan (2008) Lattice: Multivariate Data Visualization with R. Springer, New York. ISBN 978-0-387-75968-5

Taiyun Wei and Viliam Simko (2021). R package "corrplot": Visualization of a Correlation Matrix (Version 0.89). Available from https://github.com/taiyun/corrplot

Therneau T (2021). _A Package for Survival Analysis in R_. R package version 3.2-11,<URL: https://CRAN.R-project.org/package=survival>.

Wickham et al., (2019). Welcome to the tidyverse. Journal of Open Source Software, 4(43), 1686, https://doi.org/10.21105/joss.01686

Zeileis A, Croissant Y (2010). “Extended Model Formulas in R: Multiple Parts andMultiple Responses.” _Journal of Statistical Software_, *34*(1), 1-13. doi:10.18637/jss.v034.i01 (URL: https://doi.org/10.18637/jss.v034.i01).
